# Supplementary material for: Adenosine-to-inosine Alu RNA editing controls the stability of the pro-inflammatory long noncoding RNA NEAT1 in atherosclerotic cardiovascular disease
Source: PubMed Central journal article supplement — J Mol Cell Cardiol. 2021 Nov;160:111–20. doi: 10.1016/j.yjmcc.2021.07.005 (PMC8585018; doi:10.1016/j.yjmcc.2021.07.005), 2021-11
Supplement: mmc1.pdf [file mmc1.pdf]

## Supplementary material

for

### Adenosine-to-inosine *Alu* RNA editing controls the stability of the pro-inflammatory long noncoding RNA *NEAT1* in atherosclerotic cardiovascular disease

Nikolaos I. Vlachogiannis<sup>1,2,\*</sup>, Marco Sachse<sup>1,3\*</sup>, Georgios Georgiopoulos<sup>4</sup>, Eleftherios Zormpas<sup>1</sup>, Dimitrios Bampatsias<sup>4</sup>, Dimitrios Delialis<sup>4</sup>, Francesca Bonini<sup>1,3</sup>, George Galyfos<sup>5</sup>, Fragiska Sigala<sup>5</sup>, Kimon Stamatelopoulos<sup>4</sup>, Aikaterini Gatsiou<sup>1,†</sup> and Konstantinos Stellos<sup>1-3,†</sup>

<sup>1</sup>Biosciences Institute, Vascular Biology and Medicine Theme, Faculty of Medical Sciences, Newcastle University, Newcastle Upon Tyne, UK.

<sup>2</sup>Department of Cardiology, Freeman Hospital, Newcastle Hospitals NHS Foundation Trust, Newcastle upon Tyne, UK.

<sup>3</sup>Vascular Inflammation and RNA Metabolism Laboratory, Institute for Vascular Signalling, JW Goethe University Frankfurt, Frankfurt am Main, Germany.

<sup>4</sup>Department of Clinical Therapeutics, Alexandra Hospital, National and Kapodistrian University of Athens, Athens, Greece.

<sup>5</sup>First Propaedeutic Department of Surgery, National and Kapodistrian University of Athens, Hippocraton Hospital, Athens, Greece.

\* Equal first authorship

† Equal last authorship and co-correspondence.

**Correspondence shall be addressed to:** Aikaterini Gatsiou, PhD; or Konstantinos Stellos, MD; Biosciences Institute, Faculty of Medical Sciences, Newcastle University, International Centre for Life, Central Parkway, Newcastle Upon Tyne NE1 3BZ, United Kingdom. Telephone: +44(0) 191 241 8629, Fax: +44 191 241 8666. Email: [aikaterini.gatsiou@ncl.ac.uk](mailto:aikaterini.gatsiou@ncl.ac.uk) or [konstantinos.stellos@ncl.ac.uk](mailto:konstantinos.stellos@ncl.ac.uk)

**File content:**

**Supplementary Table 1:** Descriptive baseline characteristics of study cohort.

**Supplementary Table 2:** Sequences of siRNAs used in the study.

**Supplementary Table 3:** Sequences of primers used in the study.

**Supplementary Table 4:** Predictors of *NEAT1* expression in PBMCs

**Supplementary Figure 1:** Distribution of *NEAT1* expression levels across *NEAT1* tertiles.

**Supplementary Figure 2.** *NEAT1* lncRNA expression levels in PBMCs of male vs female individuals.

**Supplementary Figure 3.** *NEAT1* lncRNA expression in dose-dependent TNF- $\alpha$  treatment of HUVECs.

**Supplementary Figure 4.** Efficiency of *NEAT1* knockdown in endothelial cells.

**Supplementary Figure 5:** Supportive documentation of the dsRNA foldback analysis and the RNA editing studies.

**Supplementary Figure 6:** Supportive documentation of the ARE sites mapping on the secondary *AluSx3*<sup>+</sup> and *AluJo*<sup>-</sup> dsRNA foldback structure of *NEAT1*.

**Supplementary Table 1. Descriptive baseline characteristics of the study cohort**

|                                               | <b>Study cohort<br/>(n=153)</b> | <b>non-est.<br/>CVD<br/>individuals<br/>(n=105)</b> | <b>CAD<br/>(n=48)</b> | <b>P-<br/>value*</b> |
|-----------------------------------------------|---------------------------------|-----------------------------------------------------|-----------------------|----------------------|
| Age[years], median(IQR)                       | 64 (17)                         | 60.0 (19)                                           | 69 (13)               | <0.001               |
| Sex[male], n(%)                               | 86 (56.6)                       | 43 (41.3)                                           | 43 (89.6)             | <0.001               |
| BMI[kg/m <sup>2</sup> ], median(IQR)          | 26.8 (5.3)                      | 26.9 (5.9)                                          | 26.7 (4.4)            | 0.601                |
| Smoking, n(%)                                 | 41 (27.3)                       | 26 (25.0)                                           | 15 (32.6)             | 0.427                |
| Arterial hypertension, n(%)                   | 84 (56.0)                       | 44 (42.3)                                           | 40 (87.0)             | <0.001               |
| Hyperlipidemia, n(%)                          | 93 (62.8)                       | 53 (52.0)                                           | 40 (87.0)             | <0.001               |
| Family history of CAD, n(%)                   | 41 (27.5)                       | 27 (26.0)                                           | 14 (31.1)             | 0.552                |
| Type 2 diabetes mellitus,<br>n(%)             | 36 (24.0)                       | 17 (16.3)                                           | 19 (41.3)             | 0.002                |
| SBP[mmHg], mean(SD)                           | 131 (22)                        | 127 (19)                                            | 143 (25)              | <0.001               |
| DBP[mmHg], mean(SD)                           | 72 (11)                         | 71 (11)                                             | 74 (12)               | 0.269                |
| Creatinine[mg/dl],<br>median(IQR)             | 0.85 (0.61)                     | 0.73 (0.45)                                         | 1.13 (0.77)           | <0.001               |
| hsCRP[mg/L], median(IQR)                      | 1.52 (2.93)                     | 1.2 (2.3)                                           | 2.33 (7.26)           | 0.011                |
| eGFR[ml/min/1.73m <sup>2</sup> ],<br>mean(SD) | 80.3 (36.7)                     | 86.9 (35.5)                                         | 64.8 (35.2)           | 0.001                |
| <b>Medications at admission</b>               |                                 |                                                     |                       |                      |
| Aspirin, n(%)                                 | 37 (24.8)                       | 5 (4.8)                                             | 32 (71.1)             | <0.001               |
| Statins, n(%)                                 | 70 (47.0)                       | 36 (34.6)                                           | 34 (75.6)             | <0.001               |
| RAAS-inhibitors, n(%)                         | 53 (35.6)                       | 25 (24.0)                                           | 28 (62.2)             | <0.001               |
| Beta-blockers, n(%)                           | 46 (30.9)                       | 19 (18.3)                                           | 27 (60.0)             | <0.001               |
| Calcium channel blockers,<br>n(%)             | 37 (24.8)                       | 19 (18.3)                                           | 18 (40.0)             | 0.007                |

\*P-value represents the comparison between non-est. CVD individuals and CAD patients.

Continuous variables are presented as mean (SD) or median (IQR) when non-normally distributed. P-value is derived from independent samples t-test or Mann-Whitney U test, respectively.

Categorical variables are presented as absolute count (valid percentage) and P-values are derived from Fisher's exact test.

Abbreviations: *non-est. CVD*: non-established cardiovascular disease; *BMI*: body mass index; *CAD*: coronary artery disease; *SBP*: systolic blood pressure; *DBP*: diastolic blood pressure; *hsCRP*: high-sensitivity C-reactive protein; *eGFR*: estimated glomerular filtration rate; *RAAS*: renin-angiotensin-aldosterone system

| Name                  | siRNA sequence (5' - 3')    |                 |
|-----------------------|-----------------------------|-----------------|
| scrambled siRNA       | UCUCUCACAACGGGCAUUU(dT)(dT) | Sigma-Aldrich   |
| siADAR1               | GCUAUUUGCUGUCGUGUGA(dT)(dT) | Sigma-Aldrich   |
| siELAVL1              | GGCUUGAGGCUCAGUCAAA(dT)(dT) | Sigma-Aldrich   |
| siAUF1                | GAAGGUGAUUGAUCCUAAA(dT)(dT) | Sigma-Aldrich   |
| siPOOL neg. control   | n/a                         | siTOOLS Biotech |
| siPOOL <i>NEAT1.2</i> | n/a                         | siTOOLS Biotech |

| Name                      | Forward primer (5' - 3') | Reverse primer (5' - 3') |
|---------------------------|--------------------------|--------------------------|
| RPLP0                     | TCGACAATGGCAGCATCTAC     | ATCCGTCTCCACAGACAAGG     |
| ADAR1                     | TGCTGCTGAATTC AAGTTGG    | CCCCAACTTTTGCTTGGTAA     |
| NEAT1 long                | GGCCAGAGCTTTGTTGCTTC     | GGTGCGGGCACTTACTTACT     |
| HuR (ELAVL1)              | GAAGACCACATGGCCGAAGA     | CCAAGCTGTGTCCTGCTACT     |
| AUF1 (HNRNPD)             | CACAGCGGGAAGAATGGAAAA    | TGGCTTTGGCCCTTTTAGGA     |
| NEAT1 AluJo <sup>-</sup>  | GCCAGTAACCCTGGAAGAAC     | GTTCCCAACCCTCTGCACTG     |
| NEAT1 AluSx3 <sup>+</sup> | GTGGTCAGGGAAGGTAACCC     | ATCCTACCCAAAACCTGCCTG    |

|                          | Univariable      |         | Adjusted for presence of CAD |                  |
|--------------------------|------------------|---------|------------------------------|------------------|
|                          | OR (95% CI)      | P-value | Adjusted OR (95% CI)*        | Adjusted P-value |
| Male sex                 | 2.16 (1.18-3.93) | 0.012   | 1.25 (0.64 – 2.44)           | 0.515            |
| Arterial hypertension    | 1.80 (0.99-3.27) | 0.053   | 1.04 (0.53 – 2.03)           | 0.908            |
| Aspirin                  | 4.40 (2.09-9.29) | <0.001  | 2.12 (0.76 – 5.93)           | 0.151            |
| Calcium channel blockers | 2.28 (1.12–4.64) | 0.022   | 1.73 (0.83-3.60)             | 0.141            |
| Presence of CAD          | 4.43 (2.24-8.78) | <0.001  | n/a                          | n/a              |

Odds ratio was calculated using ordinal logistic regression with NEAT1 tertiles as dependent variable.

**Supplementary Figure 1**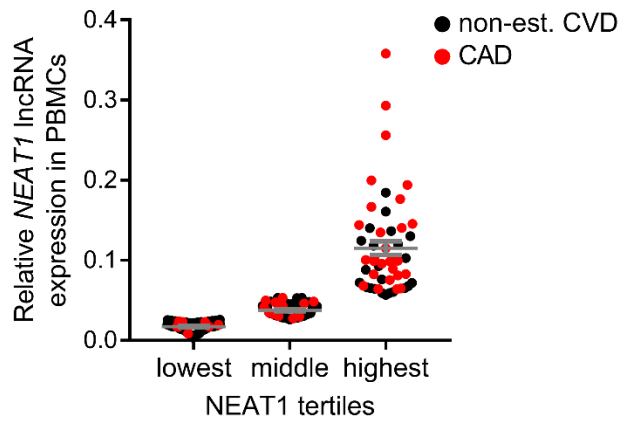**Supplementary Figure 1. Distribution of *NEAT1* expression levels across *NEAT1* tertiles.**

Dot plots represent individual *NEAT1* lncRNA expression levels in PBMCs in the lowest (n=51), middle (n=51) and highest (n=51) *NEAT1* tertile. Black dots represent non-established CVD individuals (controls, n=105), while red dots represent patients with CAD (n=48). Lines represent mean $\pm$ SEM per tertile. SEM: standard error mean.

**Supplementary Figure 2**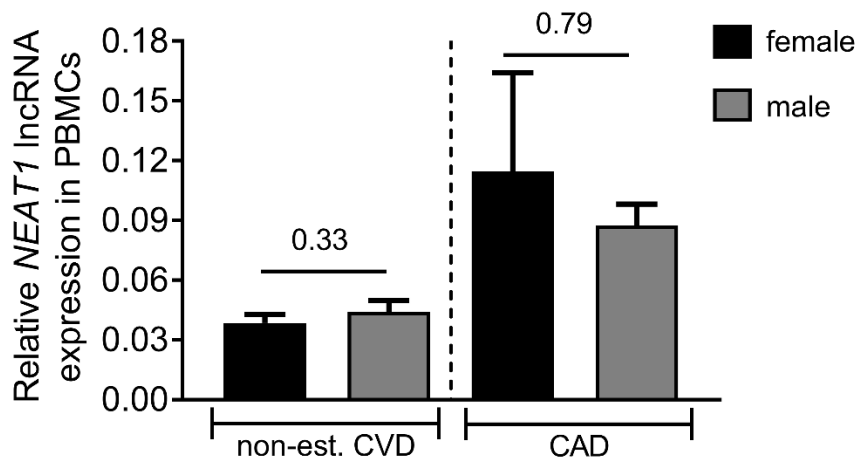

**Supplementary Figure 2. NEAT1 lncRNA expression levels in PBMCs of male vs female individuals.** *NEAT1* lncRNA expression in PBMCs of male vs female individuals without established CVD (non-est. CVD) and in CAD patients. Bar-graphs represent mean+SEM. SEM: standard error mean.

**Supplementary Figure 3**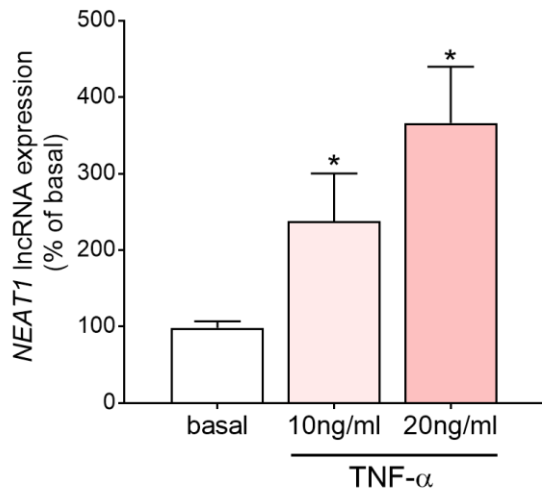

**Supplementary Figure 3. NEAT1 lncRNA expression in dose-dependent TNF- $\alpha$  treatment of HUVECs.**  $P < 0.05$  vs basal for all using Mann Whitney  $U$  test. One-way ANOVA analysis followed by multiple comparisons Dunnett's correction statistical test showed that *NEAT1* lncRNA expression remained significantly increased only after 20 ng/ml TNF- $\alpha$  treatment ( $P = 0.015$  vs basal).

**Supplementary Figure 4**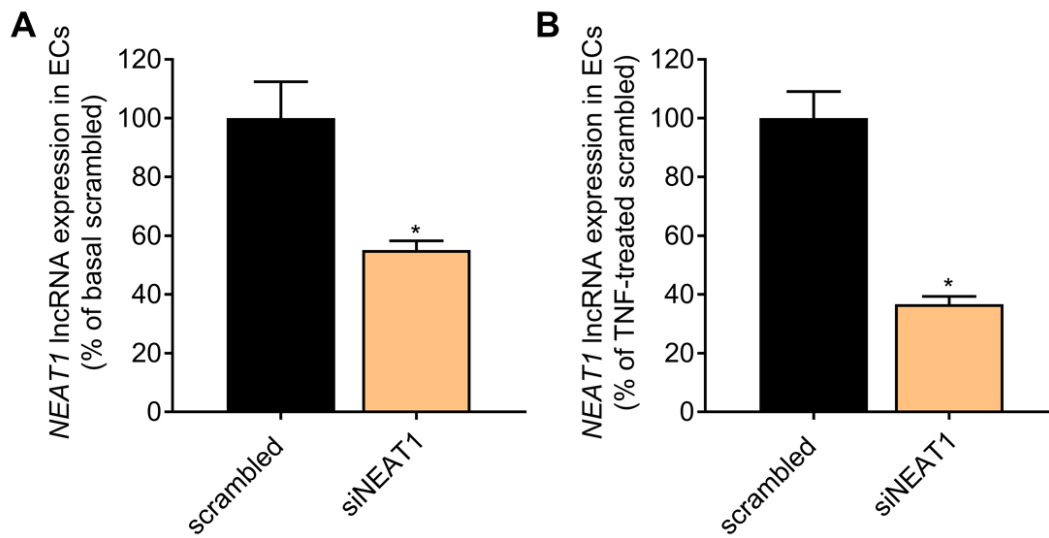

**Supplementary Figure 4. Efficiency of NEAT1 knockdown in endothelial cells.** *NEAT1* lncRNA expression in scrambled- vs siNEAT1-transfected endothelial cells. Bar-graphs represent mean+SEM derived from 4 independent biological replicates. SEM: standard error mean \*P<0.05 vs scrambled.



**Supplementary Figure 5**

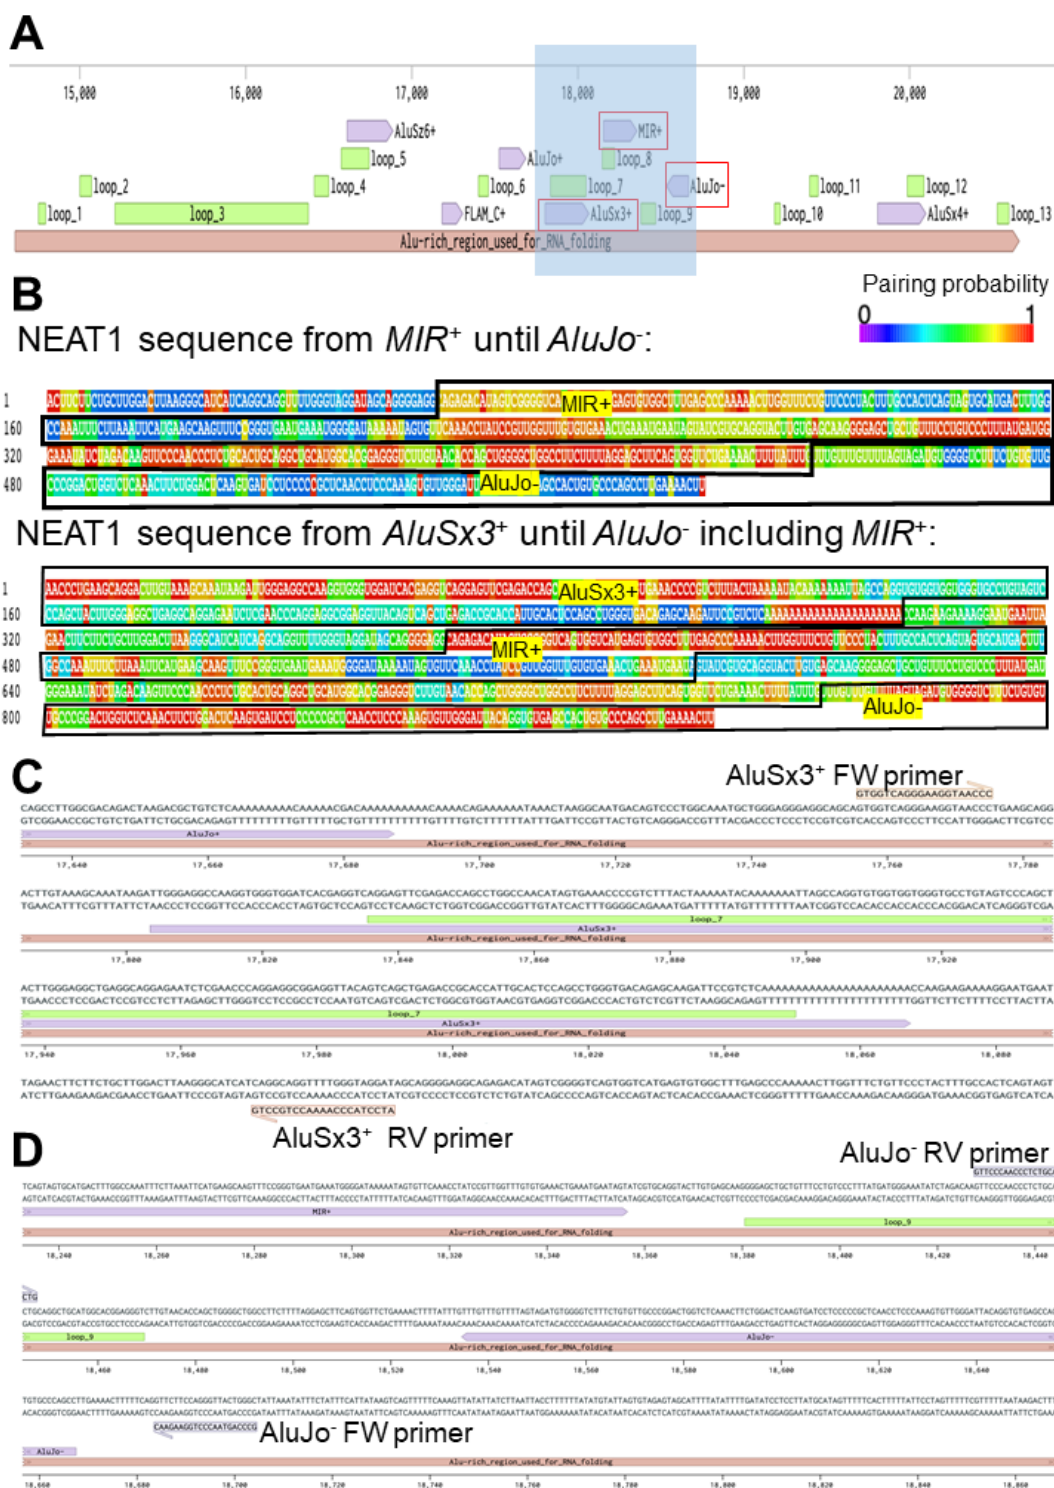

**Supplementary Figure 5. A.** Graphical representation of the short interspersed nuclear elements in *NEAT1* 3' end and the predicted RNA loops formed. **B.** Base pairing probability of *MIR*<sup>+</sup>/*AluJo*<sup>-</sup> (upper panel) and *AluSx3*<sup>+</sup>/*MIR*<sup>+</sup>/*AluJo*<sup>-</sup> (lower panel). **C,D.** Graphical representation of the cDNA region amplified by *AluSx3*<sup>+</sup> and *AluJo*<sup>-</sup> primer pairs used for RNA editing studies.

## Supplementary Figure 6

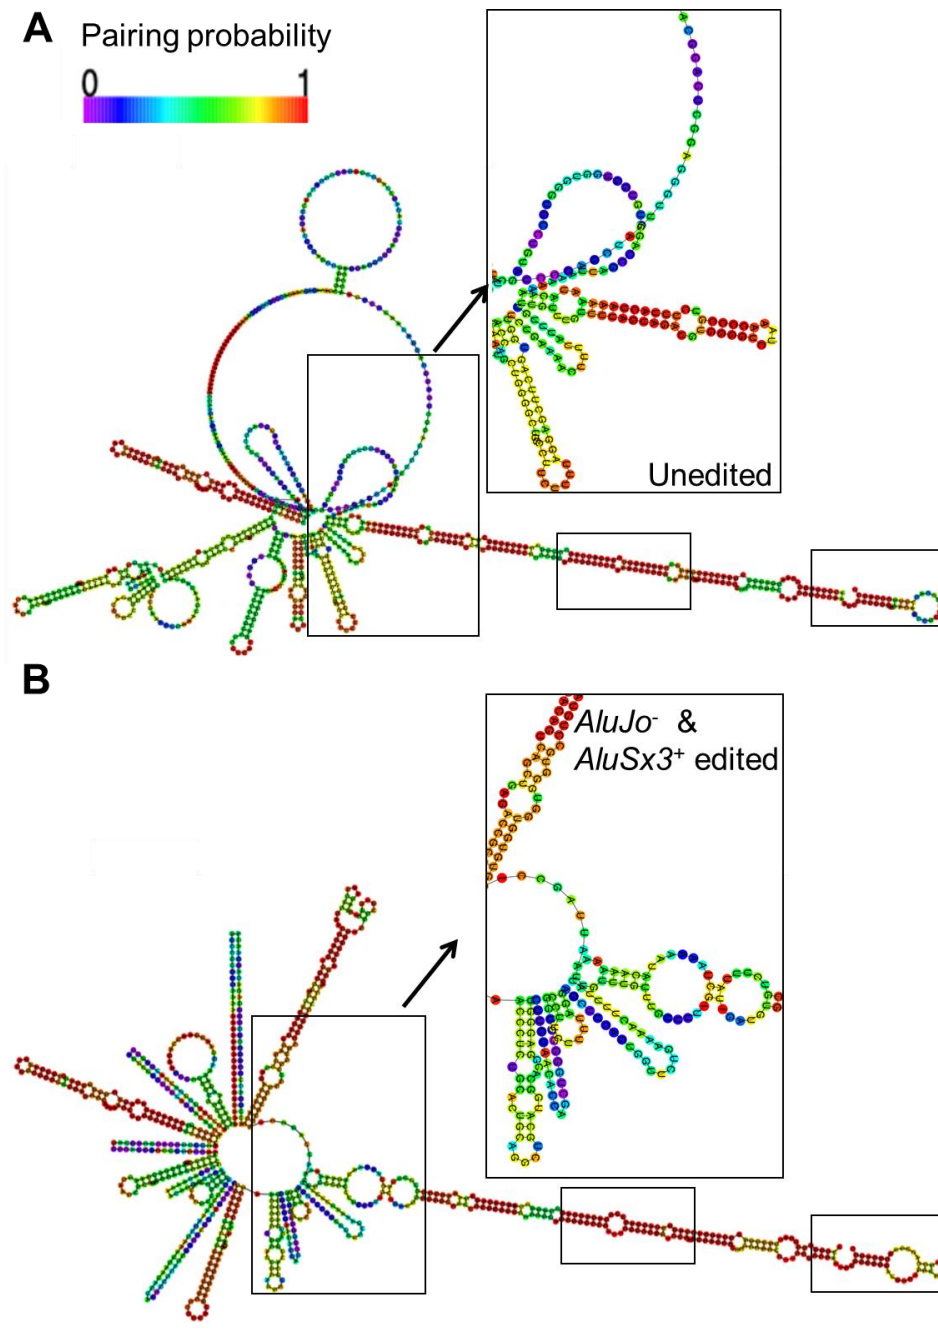

**Supplementary Figure 6. A.** Graphical representation of NEAT1 3' end depicting Alu elements and AUF1/ HuR binding motifs. **B.** RNA foldback analysis of the region in *NEAT1* 3' end including *AluSx3<sup>+</sup>*/*MIR<sup>+</sup>*/*AluJo<sup>-</sup>* including all editing sites validated by Sanger-sequencing in our study. The enlarged regions were used in Figure 6C for the mapping of the ARE sites.
